# Supplementary material
Source: Springer Nature journal article supplement (https://www.springermedizin.de/resource/supplementary/12970_2010_177_MOESM4_ESM.pdf/9594522)

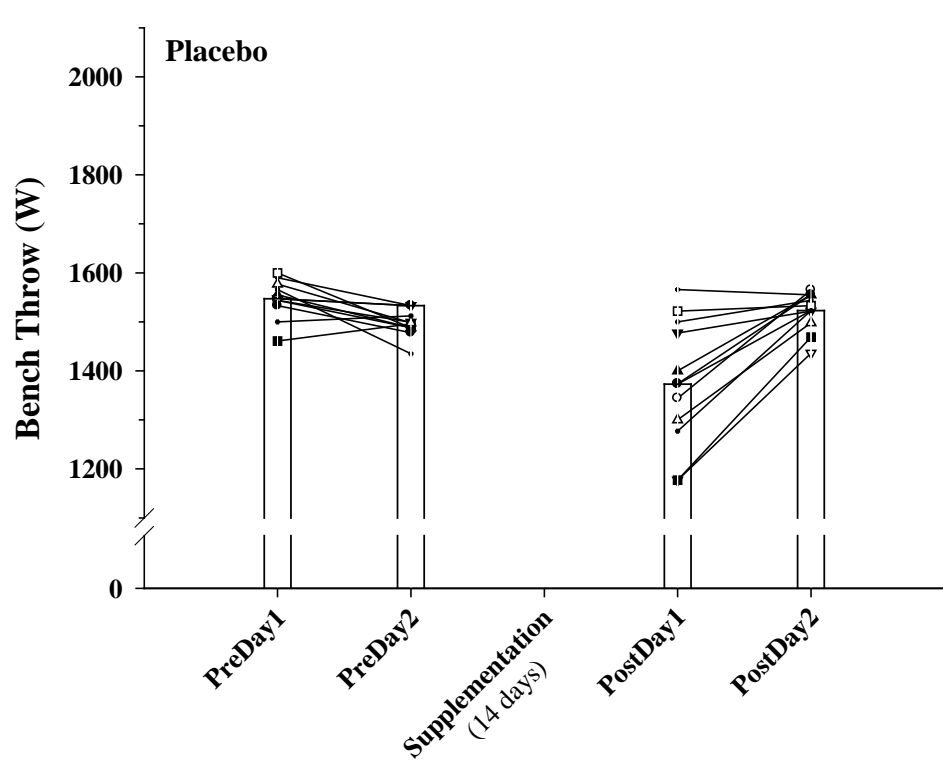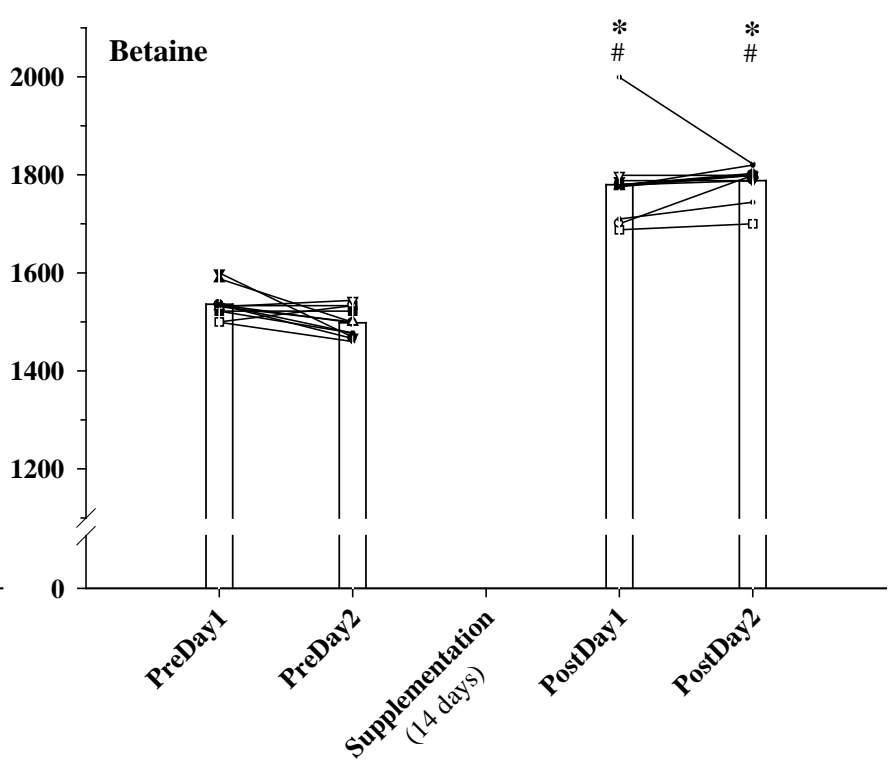

Supplement: MOESM4 [file 9594522]
